# Supplementary material for: Hospital-at-Home Interventions vs In-Hospital Stay for Patients With Chronic Disease Who Present to the Emergency Department: A Systematic Review and Meta-analysis
Source: PubMed Central journal article supplement (PMC8188269; doi:10.1001/jamanetworkopen.2021.11568), 2021-06-08
Supplement: jamanetwopen-e2111568-s001.pdf [file jamanetwopen-e2111568-s001.pdf]

## Supplementary Online Content

Arsenault-Lapierre G, Henein M, Gaid D, Le Berre M, Gore G, Vedel I. Hospital-at-home interventions vs in-hospital stay for patients with chronic disease who present to the emergency department: a systematic review and meta-analysis. *JAMA Netw Open*. 2021;4(6):e2111568. doi:10.1001/jamanetworkopen.2021.11568

**eAppendix 1.** Methods Details

**eAppendix 2.** Data Transformation

**eTable 1.** Justification for Narrative Synthesis

**eTable 2.** Justification for Sensitivity Analyses for Mortality

**eFigure 1.** Forest Plots for Mortality Sensitivity Analyses

**eTable 3.** Justification of Sensitivity Analyses for Readmission

**eFigure 2.** Forest Plots for Readmission Sensitivity Analyses

**eTable 4.** Justification of Sensitivity Analyses for Length of Treatment

**eFigure 3.** Forest Plots for Length of Treatment Sensitivity Analyses

**eAppendix 3.** Summary of Findings Table

**eAppendix 4.** Forest Plots of Original Meta-Analyses

**eReferences**

This supplementary material has been provided by the authors to give readers additional information about their work.

## eAppendix 1. Methods Details

### Exclusion criteria

Studies with obstetric, mental health, and rehabilitation populations were excluded. Long-term care, post-surgery, services provided in outpatient settings (not within patients' homes), post-discharge interventions, end-of-life care at home, and self-care by the patient in their home, such as self-administration of an intravenous infusion, were excluded.

### Detailed electronic search strategy

We performed a 3-concept search using combinations of subject headings and text words for the concepts of "Hospital-at-Home", "ED", and "randomized controlled trials", from inception to March 4, 2019, with no language restriction.

### Original Searches

\*\*\*\*\*

#### **1. Database: Ovid MEDLINE(R) and Epub Ahead of Print, In-Process & Other Non-Indexed Citations, Ovid MEDLINE(R) Daily <1946 to Present>**

Search strategy:

- 
- 1 (hospital\* adj2 at home).tw,kf. (1132)
  - 2 Home Care Services, Hospital-Based/ (1834)
  - 3 (home\* versus hospital\* or home care versus hospital\* or home\* vs hospital\* or home care vs hospital\* or hospital\* versus home\* or hospital\* vs home\* or "home\* or hospital\*" or "home care or hospital\*" or "hospital\* or home\*").tw,kf. (612)
  - 4 Home hospitalization\*.tw,kf. (182)
  - 5 ((hospital\* or conventional care or conventional management or conventional therap\* or conventional treatment\* or usual care) adj2 alternative\*).tw,kf. (1255)
  - 6 (admission\* adj2 avoid\*).tw,kf. (616)
  - 7 ((Home-based or "at home" or home care or homecare or home treatment\* or home therap\* or ((early or earlier or home\*) adj2 discharge\*) or ((outpatient or out patient) adj (setting\* or care))) adj15 (hospital-based or hospital care or in hospital or ((inpatient or in patient) adj (care or setting\*)) or general ward\$1 or hospitaliz\* or hospitalis\* or usual care or conventional care or conventional management or conventional hospital\* or conventional therap\* or conventional treatment\*).tw,kf. (6713)
  - 8 or/2-7 (10499)
  - 9 exp emergency health services, hospital/ or ambulatory care/ or exp community health services/ (324355)
  - 10 (emergenc\* or acute or urgent care or community or outpatient\* or out patient\* or ambulatory or clinic or clinics or er or ed or ers or eds or "at hospital" or home care or homecare).mp. (2594752)
  - 11 9 or 10 (2726732)

- 12 8 and 11 (8066)
- 13 1 or 12 (8689)
- 14 ((randomized controlled trial or controlled clinical trial).pt. or randomized.ab. or randomised.ab. or placebo.ab. or drug therapy.fs. or randomly.ab. or trial.ab. or groups.ab.) not (exp animals/ not humans.sh.) (3805620)
- 14 13 and 14 (2787)

\*\*\*\*\*

## 2. Database: Embase Classic+Embase <1947 to 2019 March 01>

Search strategy:

-----  
-----

- 1 (hospital\* adj2 at home).tw,kf. (1751)
- 2 (home\* versus hospital\* or home care versus hospital\* or home\* vs hospital\* or home care vs hospital\* or hospital\* versus home\* or hospital\* vs home\* or "home\* or hospital\*" or "home care or hospital\*" or "hospital\* or home\*").tw,kf. (870)
- 3 Home hospitali#ation\*.tw,kf. (263)
- 4 ((hospital\* or conventional care or conventional management or conventional therap\* or conventional treatment\* or usual care) adj2 alternative\*).tw,kf. (1691)
- 5 (admission\* adj2 avoid\*).tw,kf. (1121)
- 6 ((Home-based or "at home" or home care or homecare or home treatment\* or home therap\* or ((early or earlier or home\*) adj2 discharge\*) or ((outpatient or out patient) adj (setting\* or care))) adj15 (hospital-based or hospital care or in hospital or ((inpatient or in patient) adj (care or setting\*)) or general ward\$1 or hospitaliz\* or hospitalis\* or usual care or conventional care or conventional management or conventional hospital\* or conventional therap\* or conventional treatment\*).tw,kf. (10763)
- 7 or/2-6 (14199)
- 8 emergency ward/ or exp emergency treatment/ or exp ambulatory care/ or exp community care/ (521155)
- 9 (emergenc\* or acute or urgent care or community or outpatient\* or out patient\* or ambulatory or clinic or clinics or er or ed or ers or eds or "at hospital" or home care or homecare).mp. (3760226)
- 10 8 or 9 (3924702)
- 11 7 and 10 (10218)
- 12 1 or 11 (11311)
- 13 crossover-procedure/ or double-blind procedure/ or randomized controlled trial/ or single-blind procedure/ or (random\* or factorial\* or crossover\* or cross over\* or placebo\* or (doubl\* adj blind\*) or (singl\* adj blind\*) or assign\* or allocat\* or volunteer\*).tw. (2140996)
- 14 12 and 13 (1918)

\*\*\*\*\*

## 3. Database: PsycINFO <1806 to February Week 4 2019>

Search Strategy:

-----  
-----

- 1 (hospital\* adj2 at home).mp. (172)

- 2 (home\* versus hospital\* or home care versus hospital\* or home\* vs hospital\* or home care vs hospital\* or hospital\* versus home\* or hospital\* vs home\* or "home\* or hospital\*" or "home care or hospital\*" or "hospital\* or home\*").mp. (164)
- 3 Home hospitali#ation\*.mp. (19)
- 4 ((hospital\* or conventional care or conventional management or conventional therap\* or conventional treatment\* or usual care) adj2 alternative\*).mp. (368)
- 5 (admission\* adj2 avoid\*).mp. (76)
- 6 ((Home-based or "at home" or home care or homecare or home treatment\* or home therap\* or ((early or earlier or home\*) adj2 discharge\*) or ((outpatient or out patient) adj (setting\* or care))) adj15 (hospital-based or hospital care or in hospital or ((inpatient or in patient) adj (care or setting\*)) or general ward\$1 or hospitaliz\* or hospitalis\* or usual care or conventional care or conventional management or conventional hospital\* or conventional therap\* or conventional treatment\*).mp. (1553)
- 7 or/2-6 (2076)
- 8 exp emergency services/ or exp outpatient treatment/ or exp community services/ (44649)
- 9 (emergenc\* or acute or urgent care or community or outpatient\* or out patient\* or ambulatory or clinic or clinics or er or ed or ers or eds or "at hospital" or home care or homecare).mp. (512502)
- 10 8 or 9 (516675)
- 11 7 and 10 (1554)
- 12 1 or 11 (1666)
- 13 (control\* or random\* or placebo\* or double blind\*).mp. or exp treatment/ (1365282)
- 14 12 and 13 (1079)

\*\*\*\*\*

#### 4. CINAHL

Search strategy:

| #   | Query                                                                                         | Limiters/Expanders            | Last Run Via                                                                                                   | Results |
|-----|-----------------------------------------------------------------------------------------------|-------------------------------|----------------------------------------------------------------------------------------------------------------|---------|
| S19 | S17 AND S18                                                                                   | Search modes - Boolean/Phrase | Interface – EBSCOhost Research Databases Search Screen - Advanced Search Database - CINAHL Plus with Full Text | 3,048   |
| S18 | (MH "randomized controlled trials" OR MH "double-blind studies" OR MH "single-blind studies") | Search modes - Boolean/Phrase | Interface – EBSCOhost Research Databases Search Screen - Advanced Search Database - CINAHL Plus with           | 542,221 |

|     |                                                                                                                                                                                                                                                                                                                                                                                                                                                                                                                            |                               |                                                                                                                                  |        |
|-----|----------------------------------------------------------------------------------------------------------------------------------------------------------------------------------------------------------------------------------------------------------------------------------------------------------------------------------------------------------------------------------------------------------------------------------------------------------------------------------------------------------------------------|-------------------------------|----------------------------------------------------------------------------------------------------------------------------------|--------|
|     | <p>OR MH "random assignment" OR MH "pretest-posttest design"<br/> OR MH "cluster sample"<br/> OR TI (randomised OR randomized) OR AB (random*) OR TI (trial) OR (MH "sample size"<br/> AND<br/> AB (assigned OR allocated OR control))<br/> OR<br/> MH "placebos" OR PT "randomized controlled trial" OR AB (control W5 group) OR MH "crossover design" OR MH "comparative studies"<br/> OR<br/> AB (cluster W3 RCT))<br/> NOT ((MH "animals+" OR MH "animal studies" OR TI (animal model*))<br/> NOT<br/> MH "human")</p> |                               |                                                                                                                                  |        |
| S17 | S1 OR S16                                                                                                                                                                                                                                                                                                                                                                                                                                                                                                                  | Search modes - Boolean/Phrase | Interface - EBSCOhost<br>Research Databases<br>Search Screen - Advanced<br>Search<br>Database - CINAHL<br>Plus with<br>Full Text | 14,985 |
| S16 | S7 AND S15                                                                                                                                                                                                                                                                                                                                                                                                                                                                                                                 | Search modes - Boolean/Phrase | Interface - EBSCOhost<br>Research Databases<br>Search Screen - Advanced                                                          | 14,614 |

|     |                                                                                                                                                                                              |                               |                                                                                                                |           |
|-----|----------------------------------------------------------------------------------------------------------------------------------------------------------------------------------------------|-------------------------------|----------------------------------------------------------------------------------------------------------------|-----------|
|     |                                                                                                                                                                                              |                               | Search Database - CINAHL Plus with Full Text                                                                   |           |
| S15 | S8 OR S9 OR S10 OR S11 OR S12 OR S13 OR S14                                                                                                                                                  | Search modes - Boolean/Phrase | Interface - EBSCOhost Research Databases Search Screen - Advanced Search Database - CINAHL Plus with Full Text | 1,242,679 |
| S14 | (MH "Outpatients")                                                                                                                                                                           | Search modes - Boolean/Phrase | Interface - EBSCOhost Research Databases Search Screen - Advanced Search Database - CINAHL Plus with Full Text | 42,637    |
| S13 | (MH "Outpatient Service")                                                                                                                                                                    | Search modes - Boolean/Phrase | Interface - EBSCOhost Research Databases Search Screen - Advanced Search Database - CINAHL Plus with Full Text | 7,471     |
| S12 | (emergenc* or acute or "urgent care" or community or outpatient* or "out patient*" or ambulatory or clinic or clinics or er or ed or ers or eds or "at hospital" or "home care" or homecare) | Search modes - Boolean/Phrase | Interface - EBSCOhost Research Databases Search Screen - Advanced Search Database - CINAHL Plus with Full Text | 991,121   |
| S11 | (MH "Emergency Medical Services+")                                                                                                                                                           | Search modes - Boolean/Phrase | Interface - EBSCOhost Research Databases Search Screen - Advanced Search Database - CINAHL Plus with Full Text | 88,008    |
| S10 | (MH "Community Health Services+")                                                                                                                                                            | Search modes - Boolean/Phrase | Interface - EBSCOhost                                                                                          | 377,143   |

|    |                                                                                                                                                                                                                                                                                                                                                                                                                                                                                            |                                  |                                                                                                                                     |        |
|----|--------------------------------------------------------------------------------------------------------------------------------------------------------------------------------------------------------------------------------------------------------------------------------------------------------------------------------------------------------------------------------------------------------------------------------------------------------------------------------------------|----------------------------------|-------------------------------------------------------------------------------------------------------------------------------------|--------|
|    |                                                                                                                                                                                                                                                                                                                                                                                                                                                                                            |                                  | Research Databases<br>Search Screen -<br>Advanced Search<br>Database - CINAHL<br>Plus with Full Text                                |        |
| S9 | (MH "Ambulatory<br>Care")                                                                                                                                                                                                                                                                                                                                                                                                                                                                  | Search modes -<br>Boolean/Phrase | Interface -<br>EBSCOhost<br>Research Databases<br>Search Screen -<br>Advanced Search<br>Database - CINAHL<br>Plus with Full Text    | 10,610 |
| S8 | (MH "Emergency<br>Service")                                                                                                                                                                                                                                                                                                                                                                                                                                                                | Search modes -<br>Boolean/Phrase | Interface -<br>EBSCOhost<br>Research Databases<br>Search Screen -<br>Advanced Search<br>Database - CINAHL<br>Plus with Full Text    | 45,423 |
| S7 | S2 OR S3 OR S4 OR<br>S5 OR S6                                                                                                                                                                                                                                                                                                                                                                                                                                                              | Search modes -<br>Boolean/Phrase | Interface -<br>EBSCOhost<br>Research Databases<br>Search Screen -<br>Advanced Search<br>Database - CINAHL<br>Plus with Full Text    | 15,628 |
| S6 | ((("Home-based" or "at<br>home" or "home care"<br>or homecare or "home<br>treatment*" or "home<br>therap*" or ((early or<br>earlier or home*) N2<br>discharge*) or<br>((outpatient or "out<br>patient") N1 (setting*<br>or care))) N15<br>("hospital-based" or<br>"hospital care" or "in<br>hospital" or ((inpatient<br>or "in patient") N1<br>(care or setting*)) or<br>"general ward*" or<br>hospitaliz* or<br>hospitalis* or "usual<br>care" or "conventional<br>care" or "conventional | Search modes -<br>Boolean/Phrase | Interface -<br>EBSCOhost<br>Research Databases<br>Search Screen -<br>Advanced Search<br>Database -<br>CINAHL Plus with<br>Full Text | 14,347 |

|    |                                                                                                                                                                                                                                     |                               |                                                                                                                         |       |
|----|-------------------------------------------------------------------------------------------------------------------------------------------------------------------------------------------------------------------------------------|-------------------------------|-------------------------------------------------------------------------------------------------------------------------|-------|
|    | management" or "conventional hospital*" or "conventional therap*" or "conventional treatment*"))                                                                                                                                    |                               |                                                                                                                         |       |
| S5 | (admission* N2 avoid*)                                                                                                                                                                                                              | Search modes - Boolean/Phrase | Interface - EBSCOhost<br>Research Databases<br>Search Screen - Advanced Search<br>Database - CINAHL Plus with Full Text | 443   |
| S4 | ((hospital* or "conventional care" or "conventional management" or "conventional therap*" or "conventional treatment*" or "usual care") N2 alternative*)                                                                            | Search modes - Boolean/Phrase | Interface - EBSCOhost<br>Research Databases<br>Search Screen - Advanced Search<br>Database - CINAHL Plus with Full Text | 633   |
| S3 | (home hospitalisation* OR home hospitalization*)                                                                                                                                                                                    | Search modes - Boolean/Phrase | Interface - EBSCOhost<br>Research Databases<br>Search Screen - Advanced Search<br>Database - CINAHL Plus with Full Text | 54    |
| S2 | (home* versus hospital* or home care versus hospital* or home* vs hospital* or home care vs hospital* or hospital* versus home* or hospital* vs home* or "home* or hospital*" or "home care or hospital*" or "hospital* or home*")) | Search modes - Boolean/Phrase | Interface - EBSCOhost<br>Research Databases<br>Search Screen - Advanced Search<br>Database - CINAHL Plus with Full Text | 3,011 |
| S1 | (hospital* N2 "at home")                                                                                                                                                                                                            | Search modes - Boolean/Phrase | Interface - EBSCOhost<br>Research Databases<br>Search Screen -                                                          | 5,115 |



|  |  |  |                                                                |  |
|--|--|--|----------------------------------------------------------------|--|
|  |  |  | Advanced Search<br>Database -<br>CINAHL Plus with<br>Full Text |  |
|--|--|--|----------------------------------------------------------------|--|

\*\*\*\*\*

## 5. Cochrane Library – Reviews, Protocols, Trials

Date Run: 04/03/2019 17:46:04

Search strategy:

-----

ID Search Hits

#1 (hospital\* NEAR/2 "at home"):ti,ab,kw 1267

#2 (home\* next versus next hospital\* or home next care next versus next hospital\* or home\* next vs next hospital\* or home next care next vs next hospital\* or hospital\* next versus next home\* or hospital\* next vs next home\* or "home or" next hospital\* or "home care or" next hospital\* or hospital\* next "or home"):ti,ab,kw 216

#3 (home next hospitalisation\* OR home next hospitalization\*):ti,ab,kw 32

#4 ((hospital\* or conventional next care or conventional next management or conventional next therap\* or conventional next treatment\* or usual next care) NEAR/2 alternative\*):ti,ab,kw 153

#5 (admission\* NEAR/2 avoid\*):ti,ab,kw 55

#6 ((Home next based or at next home or home next care or homecare or home next treatment\* or home next therap\* or ((early or earlier or home\*) NEAR/2 discharge\*) or ((outpatient or out next patient) NEAR/1 (setting\* or care))) NEAR/15 (hospital next based or hospital next care or in next hospital or ((inpatient or in next patient) NEAR/1 (care or setting\*)) or general next ward\* or hospitaliz\* or hospitalis\* or usual next care or conventional next care or conventional next management or conventional next hospital\* or conventional next therap\* or conventional next treatment\*)):ti,ab,kw 2812

#7 #2 OR #3 OR #4 OR #5 OR #6 3046

#8 (emergenc\* or acute or urgent next care or community or outpatient\* or out next patient\* or ambulatory or clinic or clinics or er or ed or ers or eds or "at hospital" or home next care or homecare):ti,ab,kw 271889

#9 #7 AND #8 2646

#10 #1 OR #9 in Cochrane Reviews, Cochrane Protocols, Trials 3205

\*\*\*\*\*

## 6. Database: AMED (Allied and Complementary Medicine) <1985 to March 2019>

Search Strategy:

-----

1 (hospital\* adj2 at home).mp. (441)

2 (home\* versus hospital\* or home care versus hospital\* or home\* vs hospital\* or home care vs hospital\* or hospital\* versus home\* or hospital\* vs home\* or "home\* or hospital\*" or "home care or hospital\*" or "hospital\* or home\*").mp. (317)

3 Home hospitali#ation\*.mp. (9)

4 ((hospital\* or conventional care or conventional management or conventional therap\* or conventional treatment\* or usual care) adj2 alternative\*).mp. (70)

- 5 (admission\* adj2 avoid\*).mp. (12)
- 6 ((Home-based or "at home" or home care or homecare or home treatment\* or home therap\* or ((early or earlier or home\*) adj2 discharge\*) or ((outpatient or out patient) adj (setting\* or care))) adj15 (hospital-based or hospital care or in hospital or ((inpatient or in patient) adj (care or setting\*)) or general ward\$1 or hospitaliz\* or hospitalis\* or usual care or conventional care or conventional management or conventional hospital\* or conventional therap\* or conventional treatment\*).mp. (2193)
- 7 or/2-6 (2314)
- 8 (emergenc\* or acute or urgent care or community or outpatient\* or out patient\* or ambulatory or clinic or clinics or er or ed or ers or eds or "at hospital" or home care or homecare).mp. (91081)
- 9 7 and 8 (2286)
- 10 1 or 9 (2301)
- 11 (control\* or random\* or placebo\* or double blind\*).mp. or trial.ti. (45157)
- 12 10 and 11 (524)

\*\*\*\*\*

## 7. HTA

<http://www.crd.york.ac.uk/PanHTA/ResultsPage.asp>

Canadian and International HTA

March 4, 2019

Search strategy:

"hospital at home" OR "hospitalization at home" OR "hospitalisation at home" OR "home hospitalization" OR "home hospitalizations" OR "home hospitalisation" OR "home hospitalisations"

8 results

\*\*\*\*\*

## 8. International Clinical Trials Registry Platform (ICTRP) – WHO

<http://apps.who.int/trialsearch/default.aspx>

March 4, 2019

Search strategy:

hospital at home OR home hospitalization OR home hospitalisation OR home hospital

92 results (98 trials)

\*\*\*\*\*

## 9. ClinicalTrials.gov

<https://clinicaltrials.gov/>

March 4, 2019

Search strategy:

"hospital at home" OR "home hospitalization" OR "home hospitalisation" OR "home hospital" OR (home AND hospital)

115 results

\*\*\*\*\*  
\*\*\*\*\*

## **Outcome definitions**

*Mortality:* Mortality was defined as the total number of deaths recorded at the available time points for each study.

*Readmission:* Readmission was defined as the number of patients who were admitted (HaH) or readmitted (in-hospital group) to the hospital at the available time points of each study. All-cause readmissions were considered, except for one study that reported readmissions due only to the disease of the population (Chronic Heart Failure, CHF)(Mendoza et al. 2009).

*Length of treatment:* Length of treatment was defined as the number of days in HaH care for the experimental group and the number of in-hospital days at the index admission for the control group.

*Long-term care admission:* Admission to long-term care was defined as the number of patients admitted to long-term care or institutionalized at the available time points.

*Anxiety and depression:* Anxiety and depression was defined as the change in depression and/or anxiety scores from baseline to the available time points.

*Quality-of-life:* Quality-of-life was defined as the change in quality-of-life scores from baseline to the available time points.

*Patients' satisfaction:* Patients' satisfaction was defined as the overall patient satisfaction scores or proportion of patients satisfied with their care at the available time points.

*Caregivers' stress:* Caregivers' stress was defined as the overall score on scale of caregiver.

*Morbidity due to hospitalization:* Morbidity due to hospitalization was defined as the number of adverse events, which included urinary tract infections (including catheter associated), falls, and standard hospital-acquired conditions at the available time points.

*Cognitive status:* Cognitive status was defined as the change in a cognitive status score at the available time points.

*Nutrition status:* Nutrition status was defined as the change in a nutrition score at the available time points.

*Functional status:* Functional status was defined as the change in a functional status score at the available time points.

*Neurological deficit:* Neurological status was defined as the change in a neurological status score at the available time points.

### **Efforts to obtain more information and data**

To clarify methods, interventions and outcome definitions from studies and include as many studies as possible (and reduce heterogeneity), as well as to clarify or obtain more data, we contacted authors by email or system-based communication, up to three times, following methods described in Godard-Sebillotte et al. (2018). If we did not obtain this information, the data was considered incomplete and not included in our analyses.

We contacted the authors of five studies for additional information or data. We received clarifications and unpublished data on length of treatment in the HaH group for one study (Echevarria et al. 2018).

## eAppendix 2. Data Transformation

| <b>Outcome</b> | <b>Study</b>                                                                                                                                           | <b>Data origin and/or transformation done before meta-analysis</b>                                                                      |
|----------------|--------------------------------------------------------------------------------------------------------------------------------------------------------|-----------------------------------------------------------------------------------------------------------------------------------------|
| Readmission    | Mendoza et al. (2009)<br>Ricauda et al. (2008)<br>Echevarria et al. (2018)<br>Tibaldi et al. (2009)<br>Davies et al. (2000)<br>Hernandez et al. (2002) | Number of observations was considered at baseline in order to account for readmissions from the beginning of the study until follow-up. |

**eTable 1.** Justification for Narrative Synthesis

| <b>Outcome</b>                   | <b>Justification</b>                                                                                                                                   |
|----------------------------------|--------------------------------------------------------------------------------------------------------------------------------------------------------|
| Anxiety and depression           | Two studies report using Geriatric Depression Scale: one reports mean, other reports median                                                            |
| Caregivers' stress               | Two studies report on Relative Stress Scale: one reports the change in score and standard deviation, other reports final scores and standard deviation |
| Functional status                | Two studies use the Activities of Daily Living: one uses median, the other uses mean                                                                   |
| Quality-of-life                  | Two studies report on St. George's Respiratory Questionnaire: one has no standard deviation or confidence interval                                     |
| Morbidity due to hospitalization | Four studies reported different morbidities and adverse events that were not comparable across studies                                                 |

**eTable 2.** Justification for Sensitivity Analyses for Mortality

| <b>Original analysis</b>                   | <b>RCT excluded</b>                                                                                                                          | <b>Justification for exclusion</b> | <b>Results of sensitivity analyses</b> | <b>Accompanying forest plot in supplemental file 3</b>                                                                                                    |
|--------------------------------------------|----------------------------------------------------------------------------------------------------------------------------------------------|------------------------------------|----------------------------------------|-----------------------------------------------------------------------------------------------------------------------------------------------------------|
| Suppl. 5, Figure A<br>RR 95%CI: 0.61, 1.15 | Vianello et al. (2013)                                                                                                                       | Younger population                 | RR 95%CI: 0.60, 1.15                   | Figure A: Forest plot of sensitivity analysis for mortality excluding the study with younger patients                                                     |
|                                            | Hernandez et al. (2003); Tibaldi et al. (2009); Levine et al. (2018); Mendoza et al. (2009); Ricauda et al. (2008); Ricauda et al. (2004)    | Follow-up period not 3 months      | RR 95%CI: 0.42, 2.21                   | Figure B: Forest plot of sensitivity analysis for mortality excluding studies with follow-up period other than 3-month                                    |
|                                            | Davies et al. (2000); Hernandez et al. (2003); Vianello et al. (2013); Echevarria et al. (2018); Levine et al. (2018); Mendoza et al. (2009) | Follow-up period was not 6 months  | RR 95%CI: 0.59, 1.22                   | Figure C: Forest plot of sensitivity analysis for mortality excluding studies with follow-up period other than 6-month follow-up                          |
|                                            | Tibaldi et al. (2009); Vianello et al. (2013); Levine et al. (2018); Mendoza et al. (2009); Ricauda et al. (2004)                            | Not COPD                           | RR 95%CI: 0.46, 1.36                   | Figure D: Forest plot of sensitivity analysis for mortality excluding studies with patients other than those with chronic obstructive pulmonary disorders |
|                                            | Davies et al. (2000); Hernandez et al. (2003); Vianello et al. (2013); Echevarria et al. (2018);                                             | Not CHF                            | RR 95%CI: 0.39, 1.98                   | Figure E: Forest plot of sensitivity analysis for mortality                                                                                               |

|  |                                                                          |  |  |                                                                           |
|--|--------------------------------------------------------------------------|--|--|---------------------------------------------------------------------------|
|  | Levine et al. (2018);<br>Ricauda et al. (2008);<br>Ricauda et al. (2004) |  |  | excluding studies<br>with patients<br>other than chronic<br>heart failure |
|--|--------------------------------------------------------------------------|--|--|---------------------------------------------------------------------------|

Legend

COPD: Chronic obstructive pulmonary disorder; CHF: Chronic heart failure; SD: standard deviation; RR: Risk Ratio; MD: Mean difference; CI: Confidence interval. \*significance level changed from statistically significant (original analysis) to not statistically significant (sensitivity analysis).



**eFigure 1.** Forest Plots for Mortality Sensitivity Analyses

Figure A: Forest plot of sensitivity analysis for mortality excluding the study with younger patients

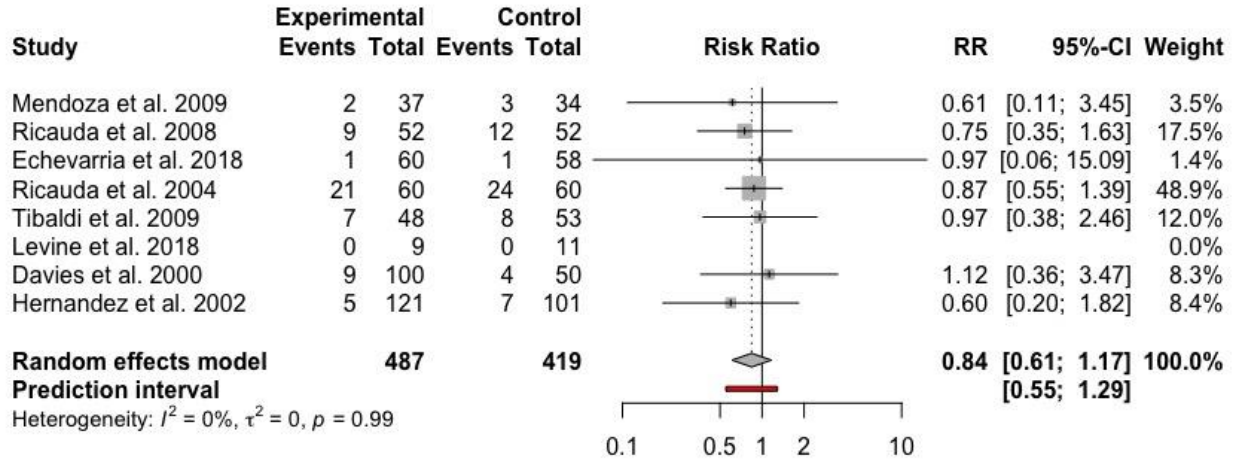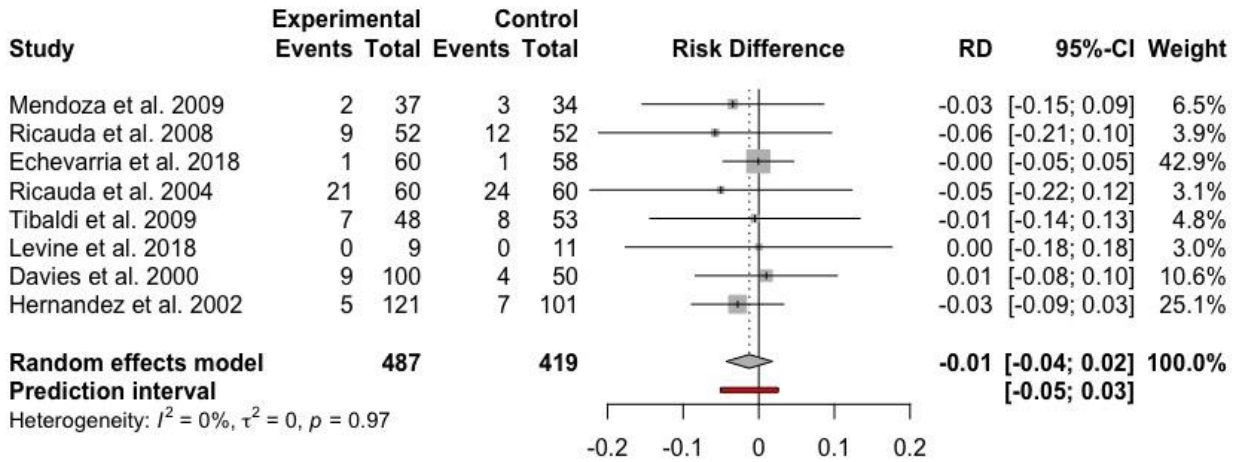

**Legend**

HaH: Hospital at Home; RR: Risk Ratio; RD: Risk Difference; CI: Confidence interval  
 $\tau^2$ : variance between studies;  $I^2$ : proportion of variance due to heterogeneity between studies.  
 Total number of observations used was sample size at baseline.

Figure B: Forest plot of sensitivity analysis for mortality excluding studies with follow-up period other than 3-month

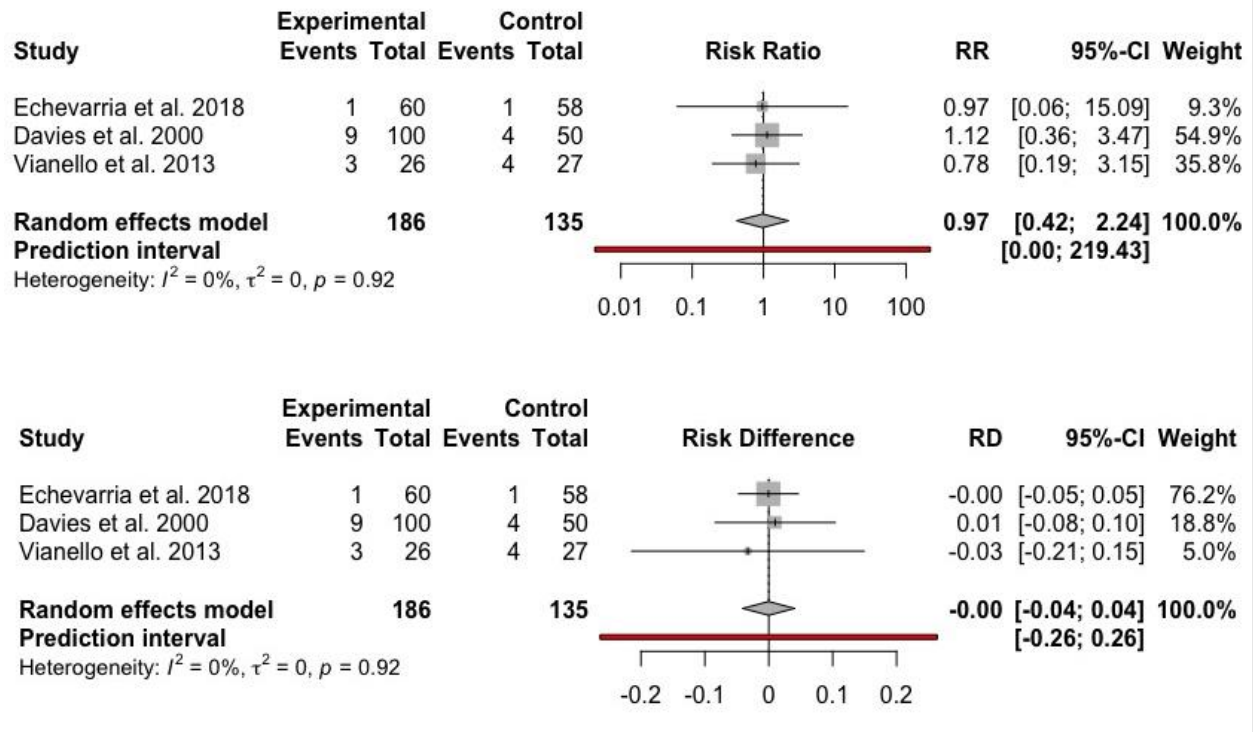

Legend

HaH: Hospital at Home; RR: Risk Ratio; RD: Risk Difference; CI: Confidence interval  
 $\tau^2$ : variance between studies;  $I^2$ : proportion of variance due to heterogeneity between studies.  
 Total number of observations used was sample size at baseline.

Figure C: Forest plot of sensitivity analysis for mortality excluding studies with follow-up period other than 6-month follow-up

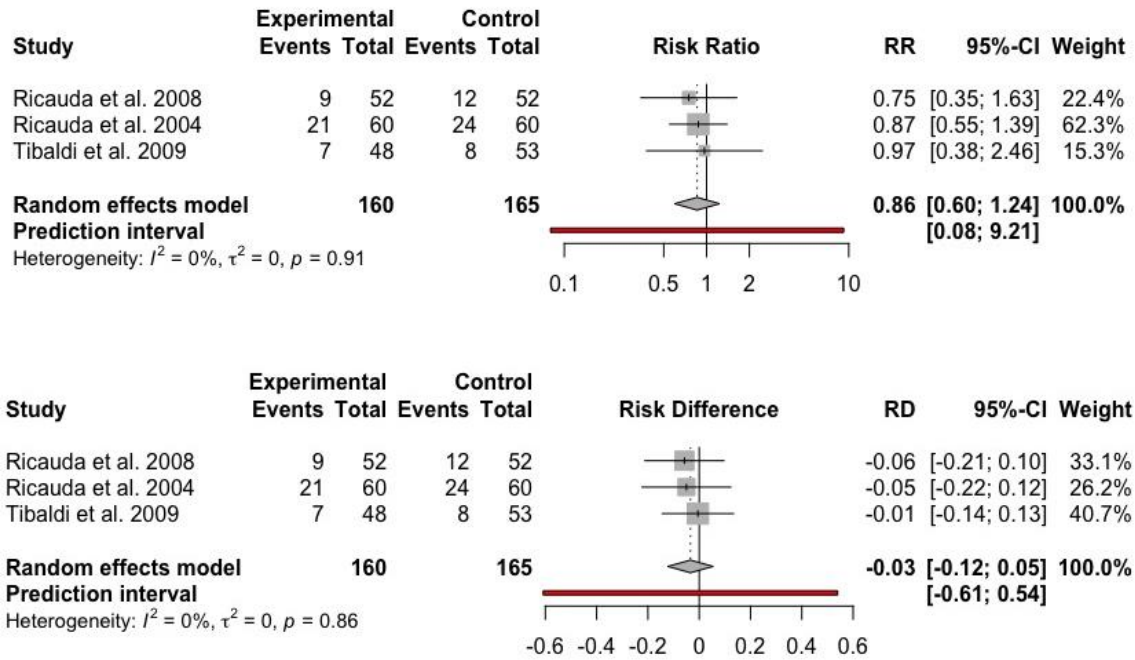

Legend

HaH: Hospital at Home; RR: Risk Ratio; RD: Risk Difference; CI: Confidence interval  
 $\tau^2$ : variance between studies;  $I^2$ : proportion of variance due to heterogeneity between studies.  
 Total number of observations used was sample size at baseline.

Figure D: Forest plot of sensitivity analysis for mortality excluding studies with patients other than those with chronic obstructive pulmonary disorders

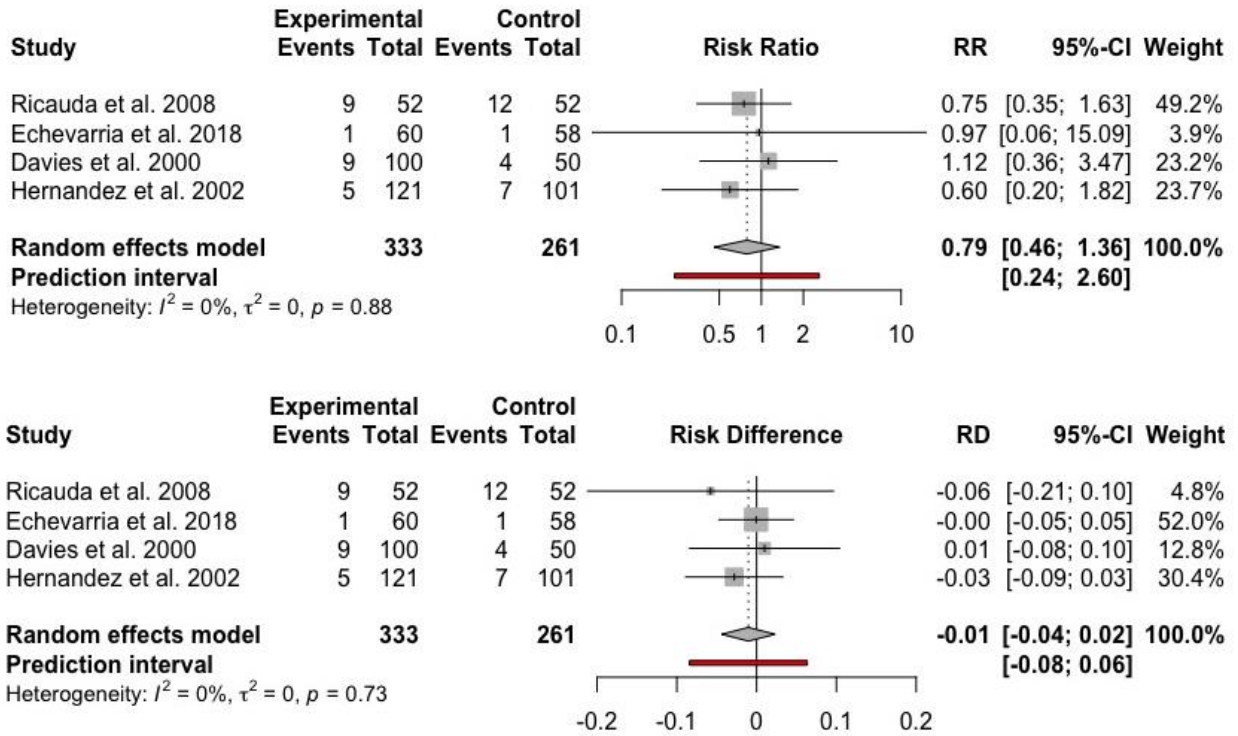

Legend

HaH: Hospital at Home; RR: Risk Ratio; RD: Risk Difference; CI: Confidence interval  
 $\tau^2$ : variance between studies;  $I^2$ : proportion of variance due to heterogeneity between studies.  
 Total number of observations used was sample size at baseline.

Figure E: Forest plot of sensitivity analysis for mortality excluding studies with patients other than chronic heart failure

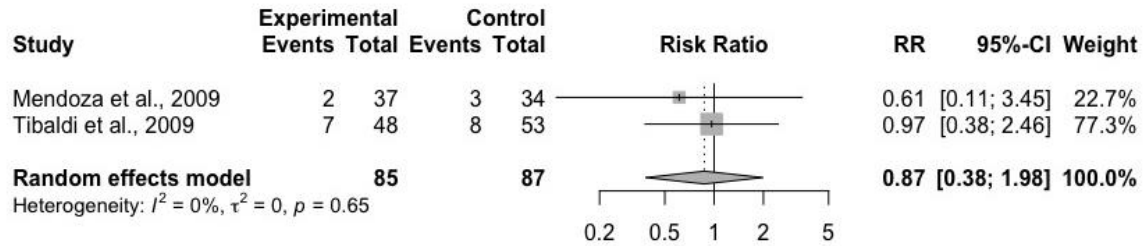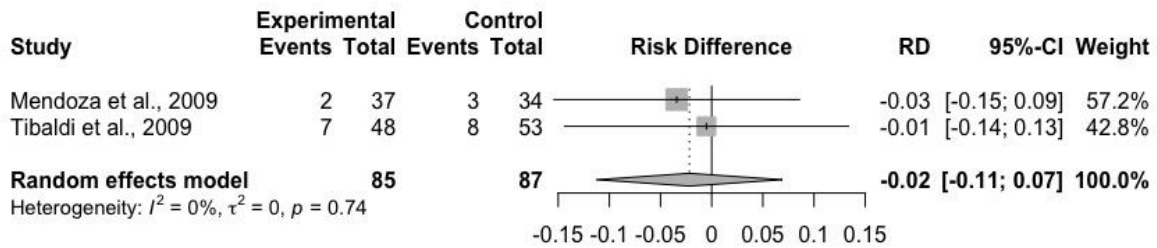

Legend

HaH: Hospital at Home; RR: Risk Ratio; RD: Risk Difference; CI: Confidence interval  
 $\tau^2$ : variance between studies;  $I^2$ : proportion of variance due to heterogeneity between studies.  
 Total number of observations used was sample size at baseline.

**eTable 3.** Justification of Sensitivity Analyses for Readmission

| <b>Original analysis</b>                   | <b>RCT excluded</b>                                                                                                              | <b>Justification for exclusion</b>     | <b>Results of sensitivity analyses</b> | <b>Accompanying forest plot in supplemental file 3</b>                                                                                                                                                          |
|--------------------------------------------|----------------------------------------------------------------------------------------------------------------------------------|----------------------------------------|----------------------------------------|-----------------------------------------------------------------------------------------------------------------------------------------------------------------------------------------------------------------|
| Suppl. 5, Figure B<br>RR 95%CI: 0.55, 0.94 | Tibaldi et al. (2009);<br>Levine et al. (2018);<br>Mendoza et al. (2009)                                                         | Not COPD                               | RR 95%CI: 0.55, 1.09*                  | eFigure 2. Forest Plots for Readmission Sensitivity Analyses<br>Figure F: Forest plot of sensitivity analysis for readmission excluding studies with patients other than chronic obstructive pulmonary disorder |
|                                            | Mendoza et al. (2009)                                                                                                            | Considered only readmission due to CHF | RR 95%CI: 0.53, 0.98                   | Figure G: Forest plot of sensitivity analysis for readmission excluding studies with patients other than all-cause readmission                                                                                  |
|                                            | Davies et al. (2000);<br>Hernandez et al. (2003);<br>Echevarria et al. (2018);<br>Levine et al. (2018);<br>Mendoza et al. (2009) | Follow-up period not 6 months          | RR 95%CI: 0.34, 0.72                   | Figure H: Forest plot of sensitivity analysis for readmission excluding studies with a follow-up period other than 6 month                                                                                      |
|                                            | Hernandez et al. (2003);<br>Tibaldi et al. (2009);<br>Levine et al. (2018);<br>Mendoza et al. (2009);<br>Ricauda et al. (2008)   | Follow-up period not 3 months          | RR 95%CI: 0.71, 1.37*                  | Figure I: Forest plot of sensitivity analysis for readmission excluding studies with a follow-up period other than 3 months                                                                                     |

|  |                                                                                                                      |                                      |                       |                                                                                                                                                                                                                                                         |
|--|----------------------------------------------------------------------------------------------------------------------|--------------------------------------|-----------------------|---------------------------------------------------------------------------------------------------------------------------------------------------------------------------------------------------------------------------------------------------------|
|  | Levine et al. (2018)                                                                                                 | Small sample size and large variance | RR 95%CI: 0.58, 0.96  | Figure J: Forest plot of sensitivity analysis for readmission excluding the study with a small sample size<br>Figure K: Forest plot of sensitivity analysis for readmission excluding studies with patients other than those with chronic heart failure |
|  | Davies et al. (2000); Hernandez et al. (2003); Echevarria et al. (2018); Levine et al. (2018); Ricauda et al. (2008) | Not CHF                              | RR 95%CI: 0.42, 1.10* | Figure K: Forest plot of sensitivity analysis for readmission excluding studies with patients other than those with chronic heart failure                                                                                                               |

Legend

RCT: Randomized Controlled Trial; COPD: Chronic Obstructive Pulmonary Disease; CHF: Chronic Heart Failure; RR: Risk Ratio; RD: Risk Difference; CI: Confidence interval.

\*significance level changed from statistically significant (original analysis) to not statistically significant (sensitivity analysis).

**eFigure 2.** Forest Plots for Readmission Sensitivity Analyses

Figure F: Forest plot of sensitivity analysis for readmission excluding studies with patients other than chronic obstructive pulmonary disorder

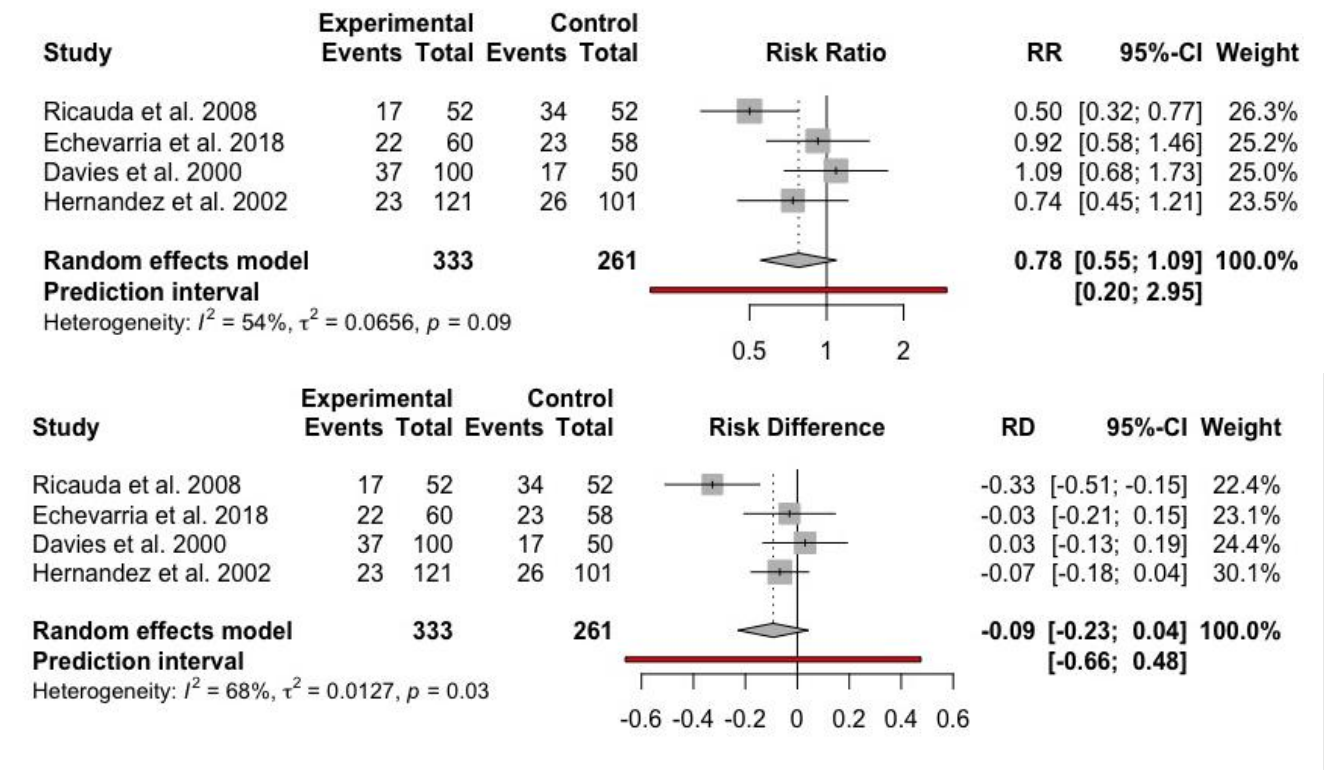

**Legend**

HaH: Hospital at Home; RR: Risk Ratio; RD: Risk Difference; CI: Confidence interval  
 $\tau^2$ : variance between studies;  $I^2$ : proportion of variance due to heterogeneity between studies.  
 Total number of observations used was sample size at baseline.



Figure G: Forest plot of sensitivity analysis for readmission excluding studies with patients other than all-cause readmission

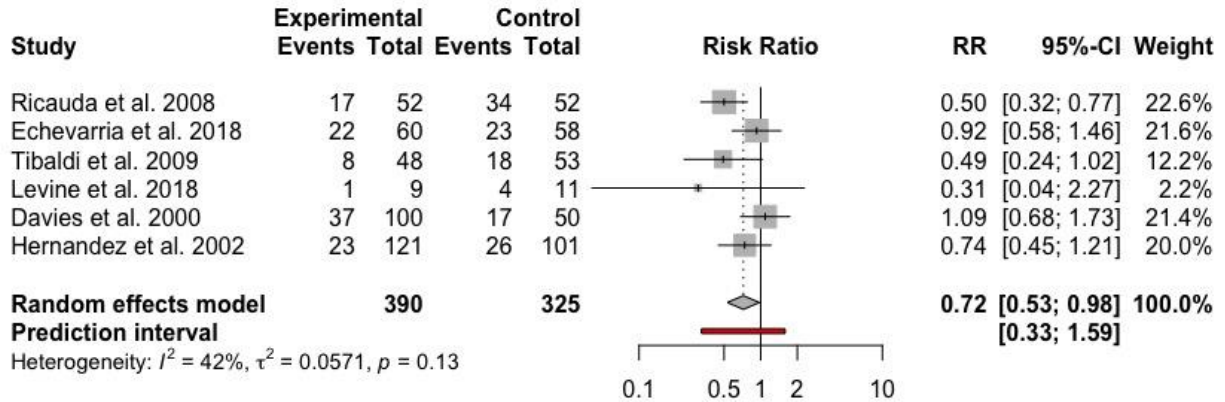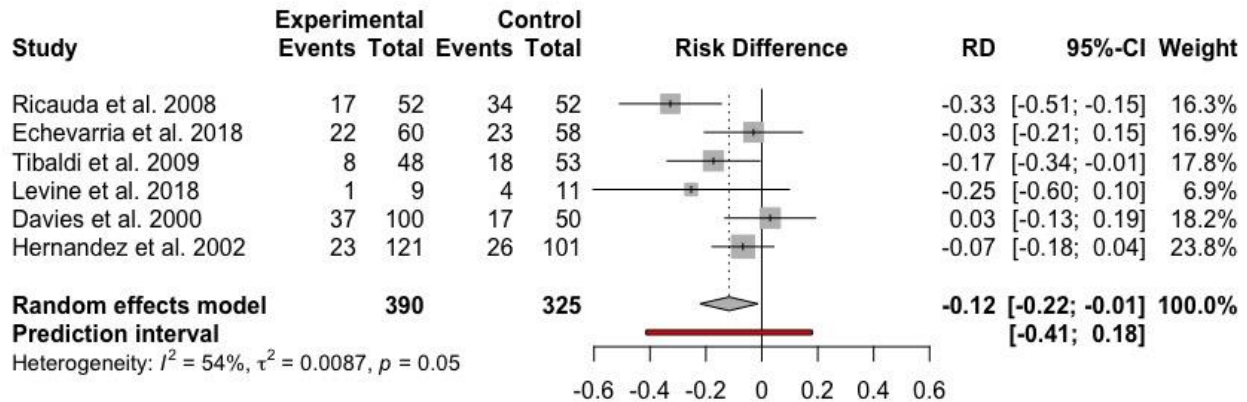

Legend

HaH: Hospital at Home; RR: Risk Ratio; RD: Risk Difference; CI: Confidence interval  
 $\tau^2$ : variance between studies;  $I^2$ : proportion of variance due to heterogeneity between studies.  
 Total number of observations used was sample size at baseline.

Figure H: Forest plot of sensitivity analysis for readmission excluding studies with a follow-up period other than 6 months

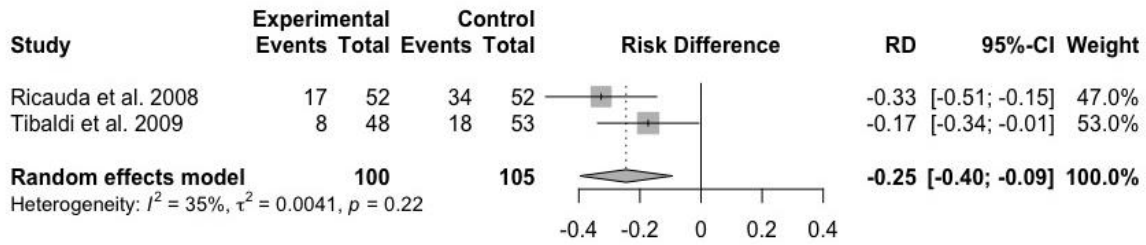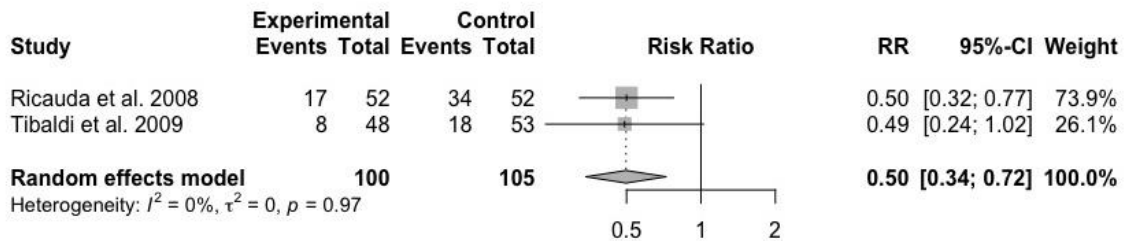

Legend

HaH: Hospital at Home; RR: Risk Ratio; RD: Risk Difference; CI: Confidence interval  
 $\tau^2$ : variance between studies;  $I^2$ : proportion of variance due to heterogeneity between studies.  
 Total number of observations used was sample size at baseline.

Figure I: Forest plot of sensitivity analysis for readmission excluding studies with a follow-up period other than 3 months

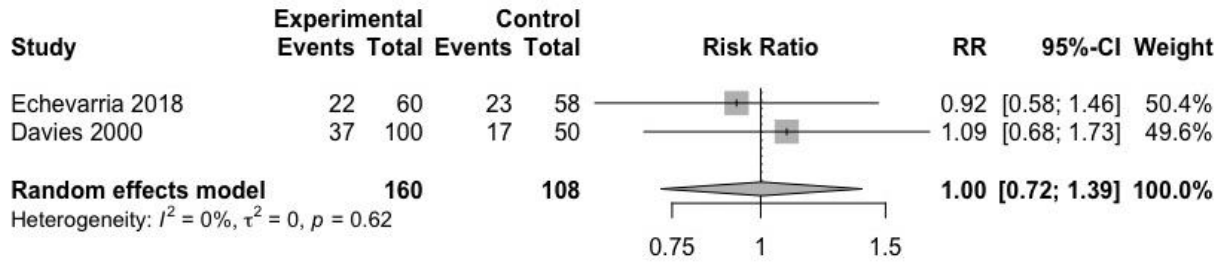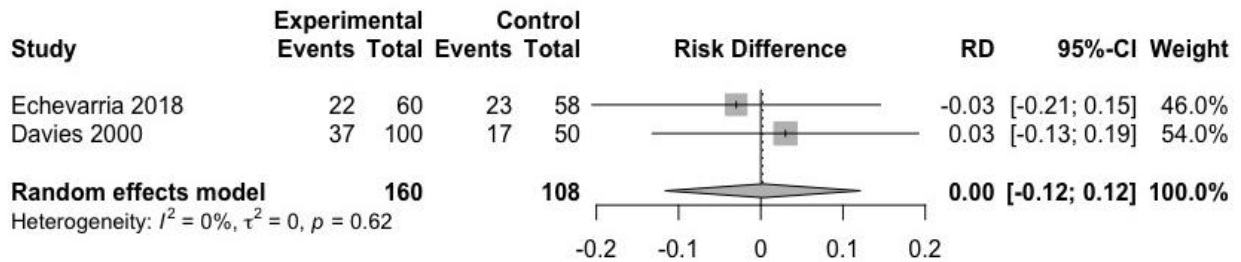

Legend

HaH: Hospital at Home; RR: Risk Ratio; RD: Risk Difference; CI: Confidence interval  
 $\tau^2$ : variance between studies;  $I^2$ : proportion of variance due to heterogeneity between studies.  
 Total number of observations used was sample size at baseline.

Figure J: Forest plot of sensitivity analysis for readmission excluding the study with a small sample size

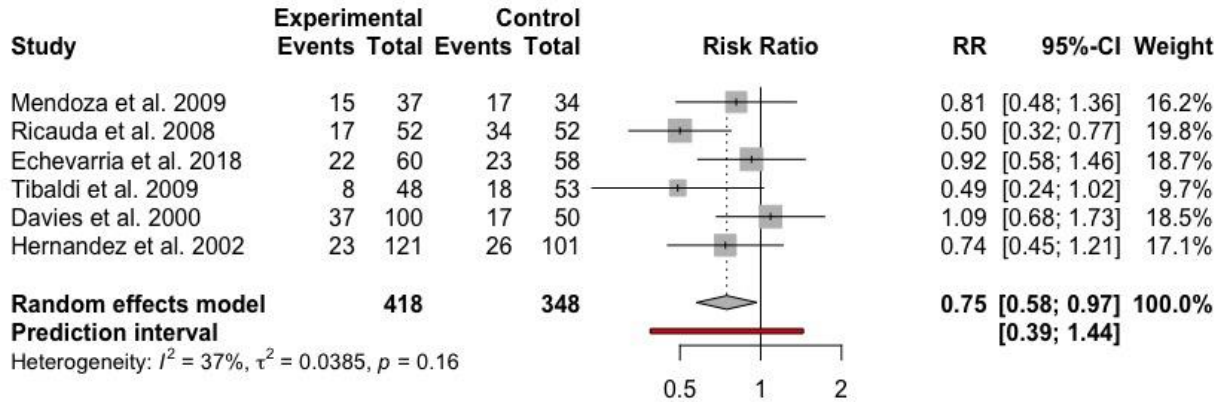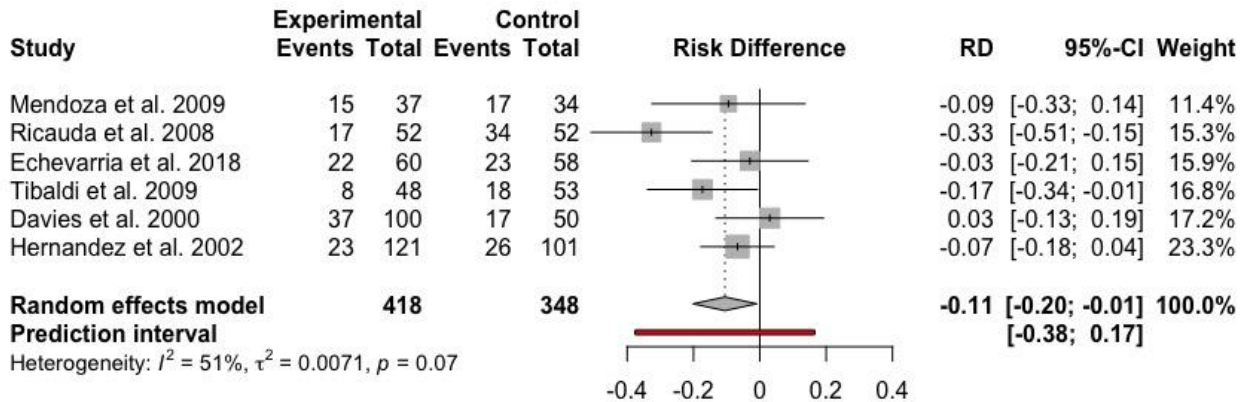

Legend

HaH: Hospital at Home; RR: Risk Ratio; RD: Risk Difference; CI: Confidence interval  
 $\tau^2$ : variance between studies;  $I^2$ : proportion of variance due to heterogeneity between studies.  
 Total number of observations used was sample size at baseline.

Figure K: Forest plot of sensitivity analysis for readmission excluding studies with patients other than those with chronic heart failure

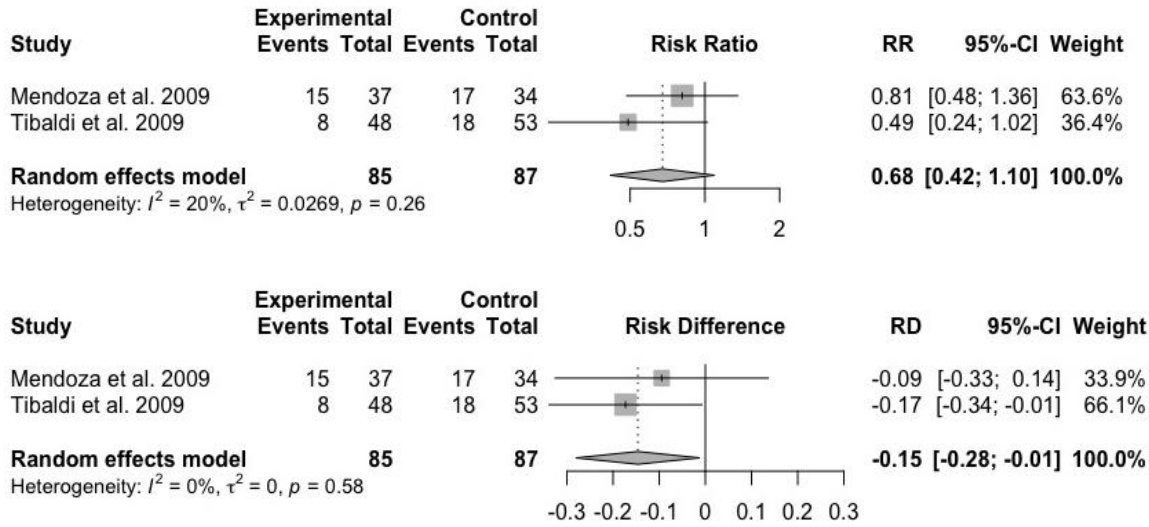

Legend

HaH: Hospital at Home; RR: Risk Ratio; RD: Risk Difference; CI: Confidence interval  
 $\tau^2$ : variance between studies;  $I^2$ : proportion of variance due to heterogeneity between studies.  
 Total number of observations used was sample size at baseline.

**eTable 4.** Justification of Sensitivity Analyses for Length of Treatment

| Original analysis                                   | RCT excluded                                                                              | Justification for exclusion   | Results of sensitivity analyses | Accompanying forest plot in supplemental file 3                                                                                                         |
|-----------------------------------------------------|-------------------------------------------------------------------------------------------|-------------------------------|---------------------------------|---------------------------------------------------------------------------------------------------------------------------------------------------------|
| Suppl. 5, Figure C<br>RR<br>95%CI:<br>1.91,<br>8.98 | Ricauda et al. (2008);<br>Ricauda et al. (2004);<br>Echevarria et al. (2018)              | Not CHF                       | MD 95%CI: -0.08, 11.85*         | Figure L: Forest plot of sensitivity analysis for length of treatment excluding studies with patients other than chronic heart failure                  |
|                                                     | <a href="#">Mendoza et al. (2009)</a><br>Echevarria et al. (2018)                         | Follow-up period not 6 months | MD 95%CI: 3.63, 13.91           | Figure M: Forest plot of sensitivity analysis for length of treatment excluding studies with follow-up period other than 6 months                       |
|                                                     | Ricauda et al. (2004);<br>Tibaldi et al. (2009);<br><a href="#">Mendoza et al. (2009)</a> | Not COPD                      | MD 95%CI: -1.18; 5.84*          | Figure N: Forest plot of sensitivity analysis for length of treatment excluding studies with patients other than chronic obstructive pulmonary disorder |

**Legend**

RCT: Randomized Controlled Trial; CHF: Chronic heart failure; MD: Mean difference; CI: Confidence interval; RR: Risk Ratio; COPD, Chronic obstructive pulmonary disorder.

\*significance level changed from statistically significant (original analysis) to not statistically significant (sensitivity analysis).

**eFigure 3. Forest Plots for Length of Treatment Sensitivity Analyses**

Figure L: Forest plot of sensitivity analysis for length of treatment excluding studies with patients other than chronic heart failure

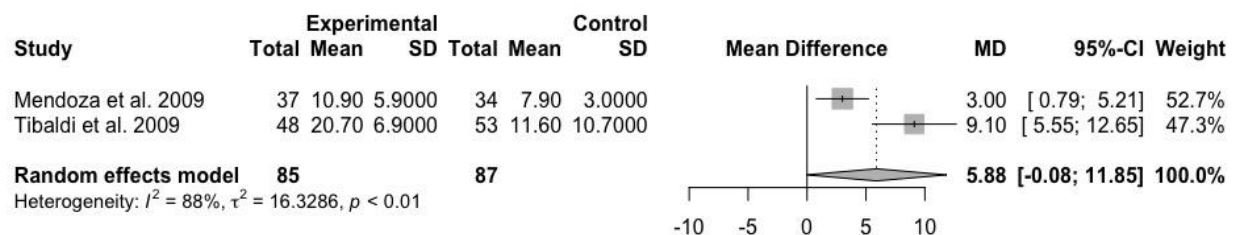

**Legend**

HaH: Hospital at Home; RR: Risk Ratio; RD: Risk Difference; CI: Confidence interval  
 $\tau^2$ : variance between studies;  $I^2$ : proportion of variance due to heterogeneity between studies.  
 Total number of observations used was sample size at baseline.

Figure M: Forest plot of sensitivity analysis for length of treatment excluding studies with follow-up period other than 6 months

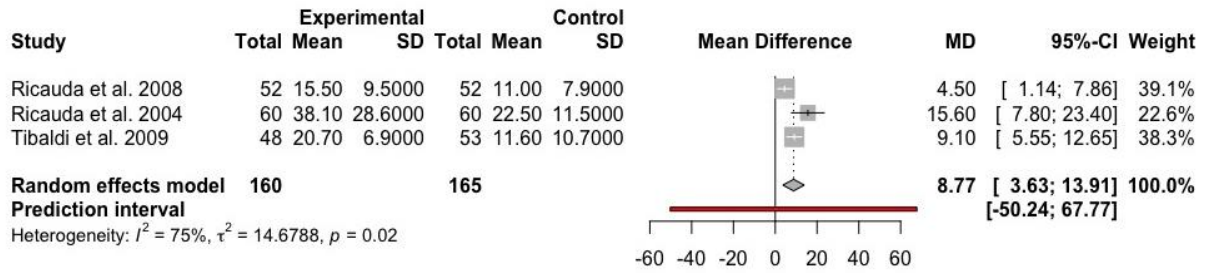

Legend

HaH: Hospital at Home; RR: Risk Ratio; RD: Risk Difference; CI: Confidence interval  
 $\tau^2$ : variance between studies;  $I^2$ : proportion of variance due to heterogeneity between studies.  
 Total number of observations used was sample size at baseline.



Figure N: Forest plot of sensitivity analysis for length of treatment excluding studies with patients other than chronic obstructive pulmonary disorder

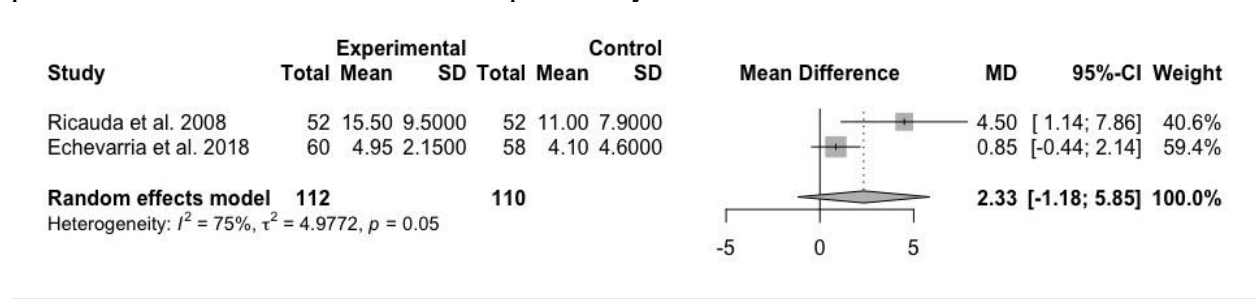

Legend

HaH: Hospital at Home; RR: Risk Ratio; RD: Risk Difference; CI: Confidence interval  
 $\tau^2$ : variance between studies;  $I^2$ : proportion of variance due to heterogeneity between studies.  
 Total number of observations used was sample size at baseline.

## eAppendix 3. Summary of Findings Table

### A) summary of meta-analyses findings

| Author                         | Year | Country       | Risk of bias (all studies had performance bias)       | Chronic diseases      | Nurse home visit | physician home visit | Length of follow-up (months) |              |              |             |                  |                  | Mortality RR | Mortality 95%CI  | Readmission RR | Readmission 95%CI | LoT MD    | LoT 95%CI | LTC RR           | LTC 95%CI |                  |  |
|--------------------------------|------|---------------|-------------------------------------------------------|-----------------------|------------------|----------------------|------------------------------|--------------|--------------|-------------|------------------|------------------|--------------|------------------|----------------|-------------------|-----------|-----------|------------------|-----------|------------------|--|
|                                |      |               |                                                       |                       |                  |                      | HaH n                        | HaH mean age | HaH female % | Control n   | Control mean age | Control female % |              |                  |                |                   |           |           |                  |           |                  |  |
| Hernandez et al.               | 2003 | Spain         | potential detection bias and potential reporting bias | COPD                  | yes              | no                   | 2                            | 121          | 71           | 3           | 101              | 71               | 3            | 0,6              | 0.20-1.82      | 0,74              | 0.58-1.46 |           |                  |           |                  |  |
| Vianello et al.                | 2013 | Italy         | potential selection bias and potential detection bias | Neuromuscular disease | yes              | no                   | 3                            | 26           | 45           | 35          | 27               | 47               | 11           | 0,78             | 0.19-3.15      |                   |           |           |                  |           |                  |  |
| Echevarria et al.              | 2018 | England       | none other than performance bias                      | COPD                  | yes              | no                   | 3                            | 60           | 71           | 53          | 58               | 69               | 52           | 0,97             | 0.06-15.09     |                   |           | 0,85      | -0.44-2.14       |           |                  |  |
| Davies et al.                  | 2000 | England       | detection bias and potential selection bias           | COPD                  | yes              | no                   | 3                            | 100          | 70           | 55          | 50               | 70               | 40           | 1,12             | 0.36-3.47      | 1,09              | 0.68-1.73 |           |                  |           |                  |  |
| Levine et al.                  | 2018 | United States | detection bias and potential reporting bias           | CHF, COPD, or asthma  | yes              | yes                  | 1                            | 9            | 65*          | 22          | 11               | 60*              | 73           |                  |                | 0,31              | 0.04-2.27 |           |                  |           |                  |  |
| Ricauda et al.                 | 2008 | Italy         | none other than performance bias                      | COPD                  | yes              | yes                  | 6                            | 52           | 80           | 44          | 52               | 79               | 25           | 0,75             | 0.35-1.63      | 0,5               | 0.32-0.77 | 4,5       | 1.14-7.86        | 0,06      | 0.00-1.33        |  |
| Tibaldi et al.                 | 2009 | Italy         | potential reporting bias                              | CHF                   | yes              | yes                  | 6                            | 48           | 82           | 54          | 53               | 80               | 43           | 0,97             | 0.38-2.46      | 0,49              | 0.24-1.02 | 9,1       | 5.55-12.65       | 0,06      | 0.00-1.09        |  |
| Mendoza et al.                 | 2009 | Spain         | potential selection bias                              | CHF                   | yes              | yes                  | 12                           | 37           | 78           | 54          | 34               | 80               | 29           | 0,61             | 0.11-3.45      | 0,81              | 0.48-1.36 | 3         | 0.79-5.21        |           |                  |  |
| Ricauda et al.                 | 2004 | Italy         | potential selection bias                              | Ischemic Stroke       | yes              | yes                  | 6                            | 60           | 83*          | 62          | 60               | 80*              | 48           | 0,87             | 0.55-1.39      |                   |           | 15,6      | 7.80-23.40       | 0,5       | 0.05-5.37        |  |
| <b>median</b>                  |      |               |                                                       |                       |                  |                      | <b>3,0</b>                   | <b>52,0</b>  | <b>71,0</b>  | <b>53,0</b> | <b>52,0</b>      | <b>71,0</b>      | <b>40,0</b>  |                  |                |                   |           |           |                  |           |                  |  |
| <b>pooled results</b>          |      |               |                                                       |                       |                  |                      |                              |              |              |             |                  |                  |              | <b>0.84</b>      |                | <b>0.74</b>       |           |           | <b>5.45</b>      |           | <b>0.16</b>      |  |
| <b>pooled 95%CI</b>            |      |               |                                                       |                       |                  |                      |                              |              |              |             |                  |                  |              | <b>0.61-1.15</b> |                | <b>0.57-0.95</b>  |           |           | <b>1.91-8.98</b> |           | <b>0.03-0.74</b> |  |
| <b>pooled heterogeneity I2</b> |      |               |                                                       |                       |                  |                      |                              |              |              |             |                  |                  |              | <b>0%</b>        |                | <b>31%</b>        |           |           | <b>87%</b>       |           | <b>0%</b>        |  |

### B) summary of narrative synthesis findings

| Author                | Year | Country       | Risk of bias (all studies had performance bias)       | Chronic diseases      | Nurse home visit | physician home visit | Length of follow-up (months) |              |              |             |                  |                  | Cognitive status | Nutrition     | Patient satisfaction | Morbidity due to hospitalization | Stress of caregiver | Anxiety and depression | Quality of life | Functional status | Neurological deficits |               |
|-----------------------|------|---------------|-------------------------------------------------------|-----------------------|------------------|----------------------|------------------------------|--------------|--------------|-------------|------------------|------------------|------------------|---------------|----------------------|----------------------------------|---------------------|------------------------|-----------------|-------------------|-----------------------|---------------|
|                       |      |               |                                                       |                       |                  |                      | HaH n                        | HaH mean age | HaH female % | Control n   | Control mean age | Control female % |                  |               |                      |                                  |                     |                        |                 |                   |                       |               |
| Hernandez et al.      | 2003 | Spain         | potential detection bias and potential reporting bias | COPD                  | yes              | no                   | 2                            | 121          | 71           | 3           | 101              | 71               | 3                |               |                      | HaH > control                    |                     |                        |                 |                   | HaH > control         |               |
| Vianello et al.       | 2013 | Italy         | potential selection bias and potential detection bias | Neuromuscular disease | yes              | no                   | 3                            | 26           | 45           | 35          | 27               | 47               | 11               |               |                      |                                  |                     |                        |                 |                   |                       |               |
| Echevarria et al.     | 2018 | England       | none other than performance bias                      | COPD                  | yes              | no                   | 3                            | 60           | 71           | 53          | 58               | 69               | 52               |               |                      |                                  |                     |                        |                 | HaH > control     | HaH > control         |               |
| Davies et al.         | 2000 | England       | detection bias and potential selection bias           | COPD                  | yes              | no                   | 3                            | 100          | 70           | 55          | 50               | 70               | 40               |               |                      |                                  |                     |                        |                 |                   | No difference         |               |
| Levine et al.         | 2018 | United States | detection bias and potential reporting bias           | CHF, COPD, or asthma  | yes              | yes                  | 1                            | 9            | 65*          | 22          | 11               | 60*              | 73               |               |                      | No difference                    | HaH > control       |                        |                 |                   |                       |               |
| Ricauda et al.        | 2008 | Italy         | none other than performance bias                      | COPD                  | yes              | yes                  | 6                            | 52           | 80           | 44          | 52               | 79               | 25               | No difference | No difference        | No difference                    | No difference       | No difference          | HaH > control   | HaH > control     | No difference         |               |
| Tibaldi et al.        | 2009 | Italy         | potential reporting bias                              | CHF                   | yes              | yes                  | 6                            | 48           | 82           | 54          | 53               | 80               | 43               |               |                      |                                  | HaH > control       | HaH > control          |                 |                   |                       |               |
| Mendoza et al.        | 2009 | Spain         | potential selection bias                              | CHF                   | yes              | yes                  | 12                           | 37           | 78           | 54          | 34               | 80               | 29               |               |                      |                                  |                     |                        |                 |                   | No difference         | No difference |
| Ricauda et al.        | 2004 | Italy         | potential selection bias                              | Ischemic Stroke       | yes              | yes                  | 6                            | 60           | 83*          | 62          | 60               | 80*              | 48               |               |                      |                                  | No difference       |                        | HaH > control   |                   | No difference         | No difference |
| <b>median</b>         |      |               |                                                       |                       |                  |                      | <b>3,0</b>                   | <b>52,0</b>  | <b>71,0</b>  | <b>53,0</b> | <b>52,0</b>      | <b>71,0</b>      | <b>40,0</b>      |               |                      |                                  |                     |                        |                 |                   |                       |               |
| <b>pooled results</b> |      |               |                                                       |                       |                  |                      |                              |              |              |             |                  |                  |                  |               |                      | Mixed                            | Mixed               | Mixed                  | HaH > control   | Mixed             | No difference         | No difference |

Legend: This table depicts an overview of each study's results, including patients and intervention characteristics, design and risk of bias appraisal, as well as the pooled average, median, relative risk (RR) or mean difference (MD), 95% confidence intervals (CI) and heterogeneity (I2) of the overall meta-analyses findings (part A) and the pooled results of the overall narrative synthesis findings (part B) of our systematic review. COPD stands for chronic obstructive pulmonary disease, CHF stands for Chronic Heart Failure, HaH stands for Hospital-at-home, LoT stands for length of treatment, and LTC stands for long-term care admission, finally 'HaH > control' signifies that the outcome under study is indicative of better health in HaH group than the in-hospital control group. The asterisks \* denotes that median age was reported and is excluded from overall patient age median.

## eAppendix 4. Forest Plots of Original Meta-Analyses

Figure A: Forest plots for mortality analyses in the HaH and in-hospital groups

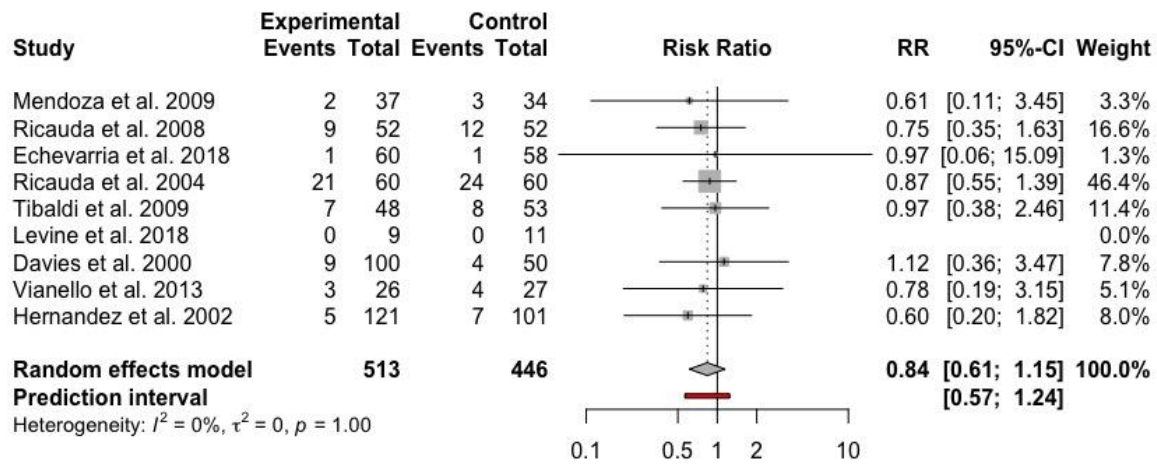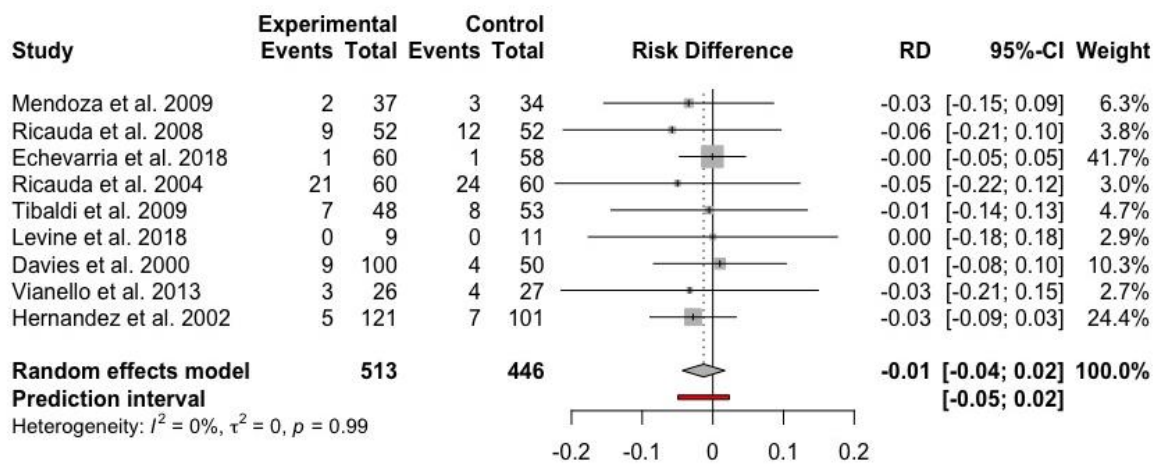

### Legend

HaH: Hospital at Home; RR: Risk Ratio; RD: Risk Difference; CI: Confidence interval;  $\tau^2$ : variance between studies;  $I^2$ : proportion of variance due to heterogeneity between studies. Total number of observations used was sample size at baseline.

Figure B: Forest plots for readmission in the HaH and in-hospital groups

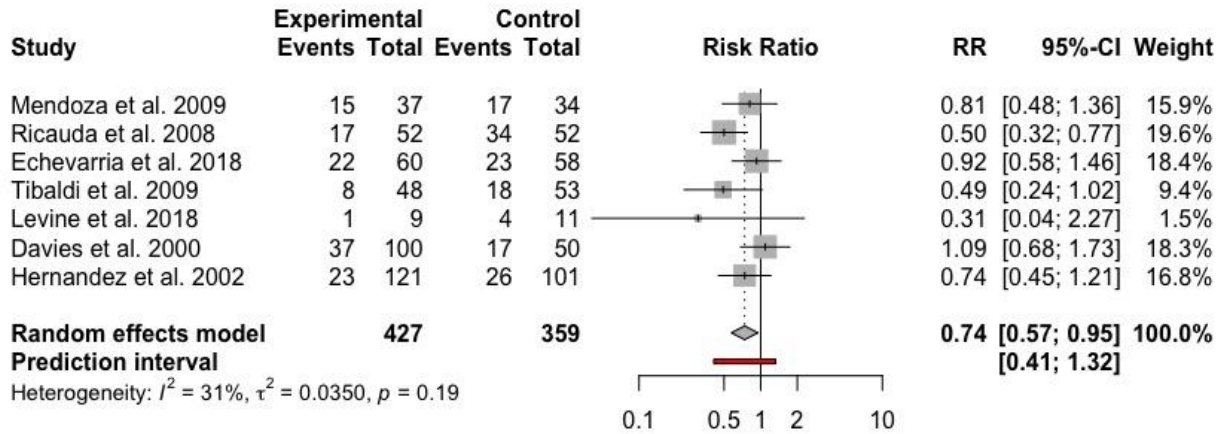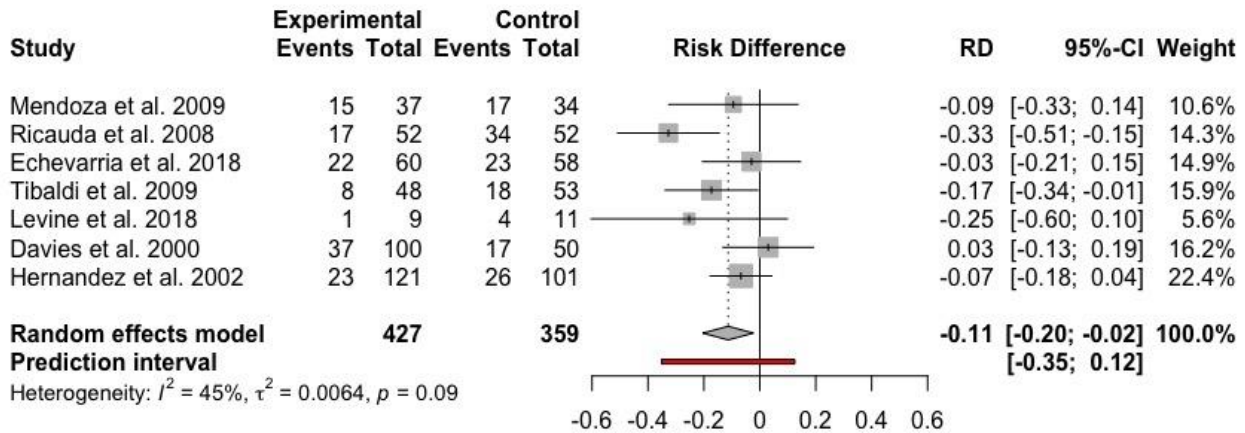

Legend

HaH: Hospital at Home; RR: Risk Ratio; RD: Risk Difference; CI: Confidence interval;  $\tau^2$ : variance between studies;  $I^2$ : proportion of variance due to heterogeneity between studies. Total number of observations used was sample size at baseline.

Figure C: Forest plots for the length of treatment in the HaH and in-hospital groups

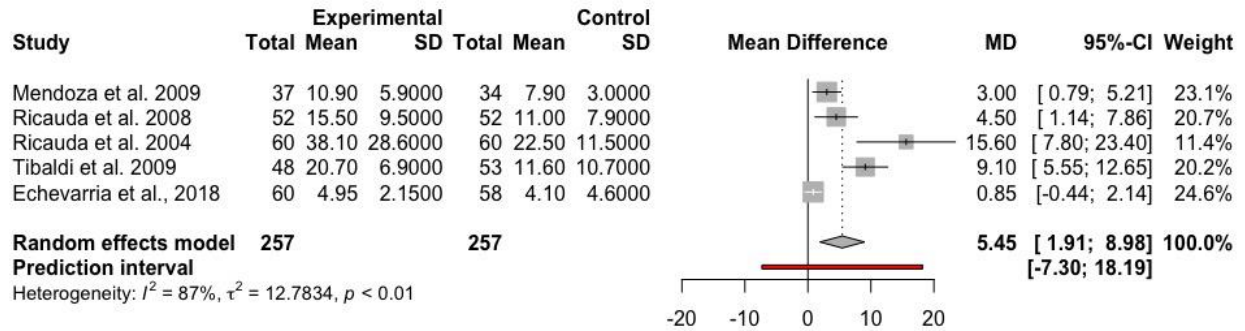

Legend

HaH: Hospital at Home; MD: Mean difference; CI: Confidence interval; SD: Standard deviation  
 $\tau^2$ : variance between studies;  $I^2$ : proportion of variance due to heterogeneity between studies.

Figure D: Forest plots for number of long-term facility admissions in the HaH and in-hospital groups

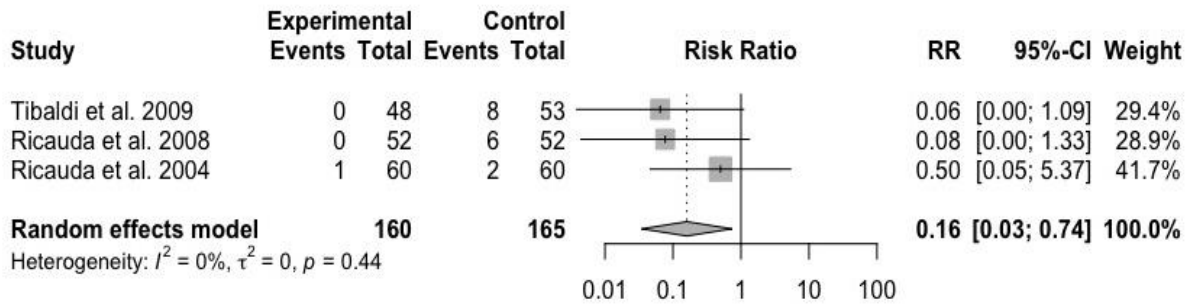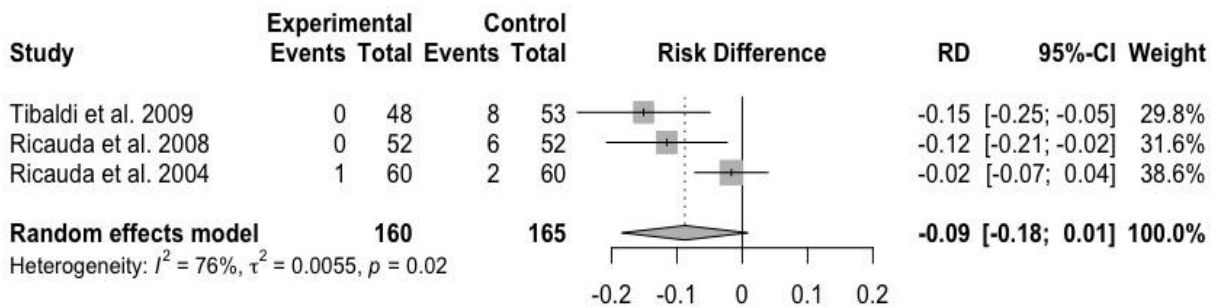

Legend

HaH: Hospital at Home; RR: Risk Ratio; RD: Risk Difference; CI: Confidence interval  
 $\tau^2$ : variance between studies;  $I^2$ : proportion of variance due to heterogeneity between studies.  
 Total number of observations used was sample size at baseline.

## eReferences

- Davies, L., M. Wilkinson, S. Bonner, P. M. Calverley, and R. M. Angus. 2000. "'Hospital at home" versus hospital care in patients with exacerbations of chronic obstructive pulmonary disease: prospective randomised controlled trial', *BMJ*, 321: 1265-8.
- Echevarria, C., J. Gray, T. Hartley, J. Steer, J. Miller, A. J. Simpson, G. J. Gibson, and S. C. Bourke. 2018. 'Home treatment of COPD exacerbation selected by DECAF score: a non-inferiority, randomised controlled trial and economic evaluation', *Thorax*, 73: 713-22.
- Godard-Sebillotte, Claire, Mélanie Le Berre, Sathya Karunanathan, Quan Nha Hong, and Isabelle Vedel. 2018. 'A digital media strategy to obtain unpublished data for a systematic review yields a very high author response rate', *J Clin Epidemiol*, 104: 141-43.
- Hernandez, C., A. Casas, J. Escarrabill, J. Alonso, J. Puig-Junoy, E. Farrero, G. Vilagut, B. Collvent, R. Rodriguez-Roisin, J. Roca, and Chronic project. 2003. 'Home hospitalisation of exacerbated chronic obstructive pulmonary disease patients', *Eur. Respir. J.*, 21: 58-67.
- Levine, D. M., K. Ouchi, B. Blanchfield, K. Diamond, A. Licurse, C. T. Pu, and J. L. Schnipper. 2018. 'Hospital-Level Care at Home for Acutely Ill Adults: a Pilot Randomized Controlled Trial', *J Gen Intern Med*, 33: 729-36.
- Mendoza, H., M. J. Martin, A. Garcia, F. Aros, F. Aizpuru, J. Regalado De Los Cobos, M. C. Bello, P. Lopetegui, and J. M. Cia. 2009. "'Hospital at home' care model as an effective alternative in the management of decompensated chronic heart failure', *EurJ Heart Fail*, 11: 1208-13.
- Ricauda, N. A., M. Bo, M. Molaschi, M. Massaia, D. Salerno, D. Amati, V. Tibaldi, and F. Fabris. 2004. 'Home hospitalization service for acute uncomplicated first ischemic stroke in elderly patients: a randomized trial', *JAGS*, 52: 278-83.
- Ricauda, NA., V. Tibaldi, B. Leff, C. Scarafiotti, R. Marinello, M. Zanolchi, and M. Molaschi. 2008. 'Substitutive "hospital at home" versus inpatient care for elderly patients with exacerbations of chronic obstructive pulmonary disease: a prospective randomized, controlled trial', *J Am Geriatr Soc*, 56: 493-500.
- Tibaldi, V., G. Isaia, C. Scarafiotti, F. Gariglio, M. Zanolchi, M. Bo, S. Bergerone, and N. A. Ricauda. 2009. 'Hospital at home for elderly patients with acute decompensation of chronic heart failure: a prospective randomized controlled trial', *Arch Intern M*, 169: 1569-75.
- Vianello, A., F. Savoia, E. Pipitone, B. Nordio, G. Gallina, L. Paladini, A. Concas, G. Arcaro, F. Gallan, and E. Pegoraro. 2013. "'Hospital at home" for neuromuscular disease patients with respiratory tract infection: a pilot study', *Respir Care*, 58: 2061-8.
